# Supplementary material for: Method validation for (ultra)-trace element concentrations in urine for small sample volumes in large epidemiological studies: application to the population-based epidemiological multi-ethnic study of atherosclerosis (MESA)
Source: Royal Society of Chemistry journal article supplement (doi:10.1039/d3ay01605f), 2023-12-04
Supplement: d3ay01605f1.pdf [file d3ay01605f1.pdf]

## **Supplementary Information**

### **Method validation for (ultra)-trace element concentrations in urine for small sample volumes in large epidemiological studies: application to the population-based epidemiological Multi-Ethnic Study of Atherosclerosis (MESA)**

Kathrin Schilling, PhD<sup>1\*</sup>, Ronald A. Glabonjat, PhD<sup>1</sup>, Olgica Balac<sup>1</sup>, Marta Gálvez-Fernández, PhD<sup>1</sup>, Arce Domingo-Relloso, PhD<sup>1</sup>, Vesna Slavkovich<sup>1</sup>, Jeff Goldsmith, PhD<sup>2</sup>, Miranda R. Jones, PhD<sup>3</sup>, Tiffany R. Sanchez, PhD<sup>1</sup>, Ana Navas-Acien, MD, PhD<sup>1\*</sup>

<sup>1</sup>Department of Environmental Health Sciences, Columbia University Mailman School of Public Health, New York, NY, USA

<sup>2</sup>Department of Biostatistics, Mailman School of Public Health, Columbia University, New York, New York, USA

<sup>3</sup>Department of Epidemiology, Johns Hopkins Bloomberg School of Public Health, Baltimore, MD, USA

**\* Correspondence:**

Kathrin Schilling

ks3759@columbia.edu

Table S1. Standard concentrations for the A) 9-point calibration and 5-point calibration

A)

| Elements      | Standard concentrations ( $\mu\text{g/L}$ ) |       |      |       |      |        |       |        |       |
|---------------|---------------------------------------------|-------|------|-------|------|--------|-------|--------|-------|
|               | 1                                           | 2     | 3    | 4     | 5    | 6      | 7     | 8      | 9     |
| Cd, Gd, Pb, U | 0.2                                         | 0.15  | 0.1  | 0.05  | 0.02 | 0.015  | 0.01  | 0.005  | 0.002 |
| Co, Mn, Tl, W | 0.5                                         | 0.375 | 0.25 | 0.125 | 0.05 | 0.0375 | 0.025 | 0.0125 | 0.005 |
| Ba, Cs        | 1                                           | 0.75  | 0.5  | 0.25  | 0.1  | 0.075  | 0.05  | 0.025  | 0.01  |
| As, Ni        | 3                                           | 2.25  | 1.5  | 0.75  | 0.3  | 0.225  | 0.15  | 0.075  | 0.03  |
| Cu            | 5                                           | 3.75  | 2.5  | 1.25  | 0.5  | 0.375  | 0.25  | 0.125  | 0.05  |
| Mo, Se, Sr    | 10                                          | 7.5   | 5    | 2.5   | 1    | 0.75   | 0.5   | 0.25   | 0.1   |
| Zn            | 100                                         | 75    | 50   | 25    | 10   | 7.5    | 5     | 2.5    | 1     |

B)

| Elements                 | Standard concentrations ( $\mu\text{g/L}$ ) |     |      |      |      |
|--------------------------|---------------------------------------------|-----|------|------|------|
|                          | 1                                           | 2   | 3    | 4    | 5    |
| Cd, Co, Cs, Mn, Sb, W, U | 0.2                                         | 0.1 | 0.05 | 0.02 | 0.01 |
| Ba, Ni, Pb, Tl,          | 1                                           | 0.5 | 0.25 | 0.1  | 0.05 |
| As, Cu, Se, Sr           | 5                                           | 2.5 | 1.25 | 0.5  | 0.25 |
| Mo                       | 10                                          | 5   | 2.5  | 1    | 0.5  |
| Zn                       | 20                                          | 10  | 5    | 2    | 1    |

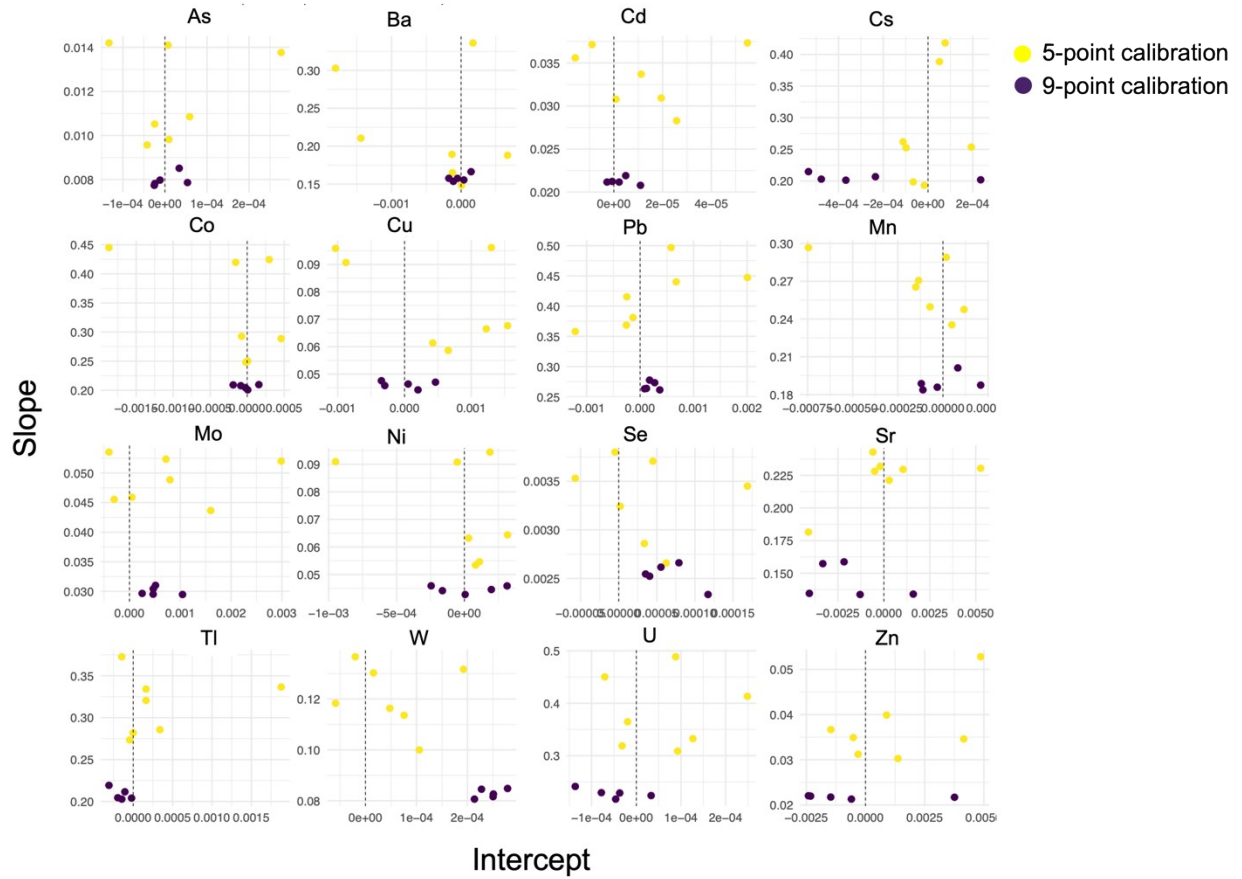

Figure S1: Intercept vs slope for each calibration regression of the 5-point calibrations (yellow) and the 9-point calibrations (purple)
